# Supplementary material
Source: PubMed Central journal article supplement (PMC5933088)

A

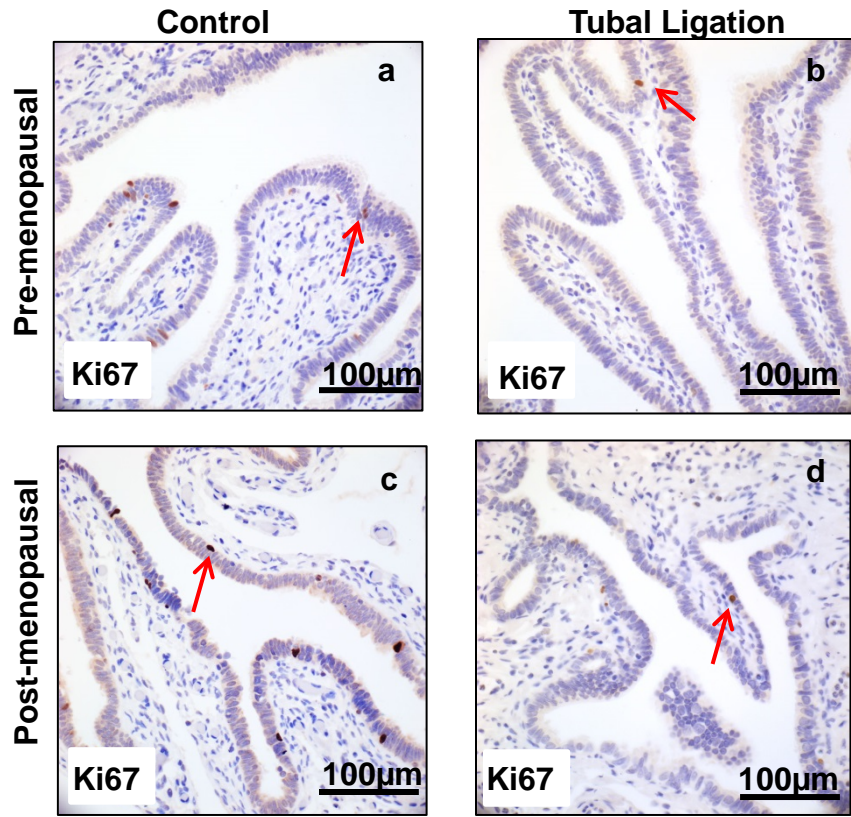

B

Median percentage of Ki67 positive epithelial cells in fimbria Control vs. Ligation

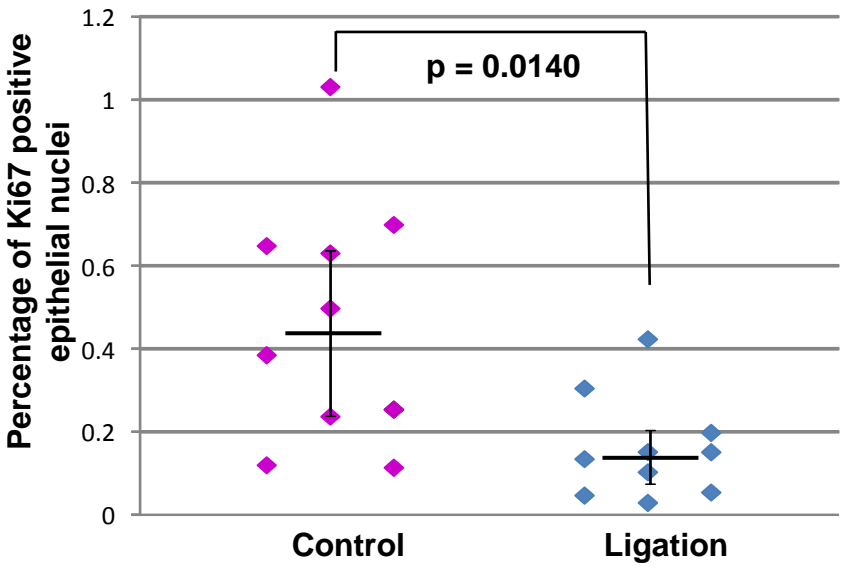

Supplementary Figure 2.

A

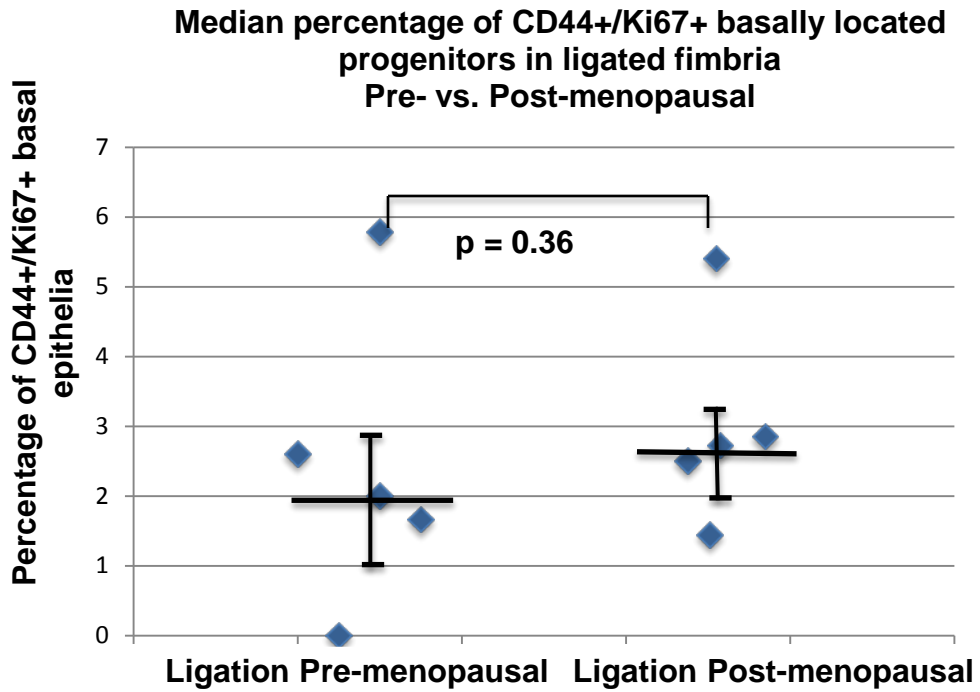

B

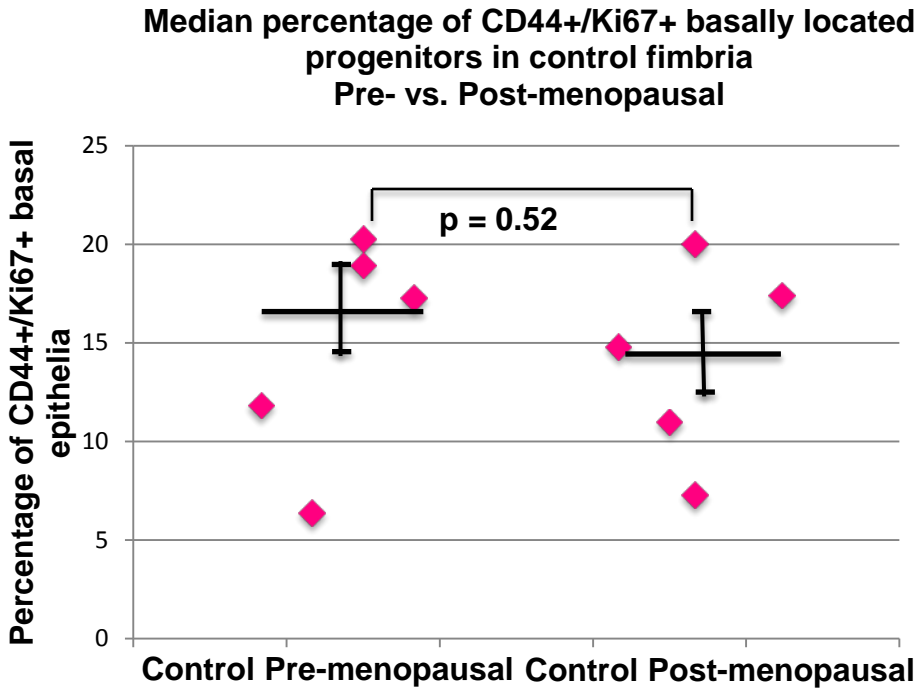

Supplemental Figure 3.

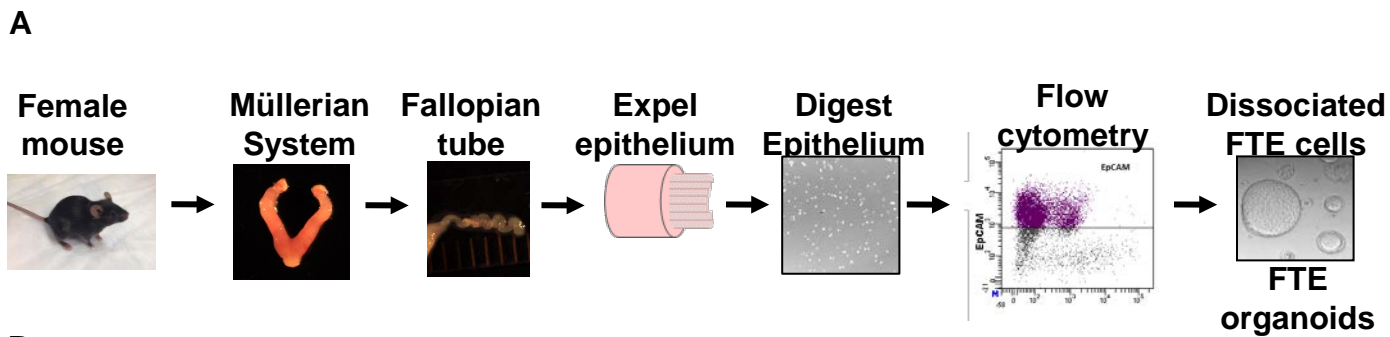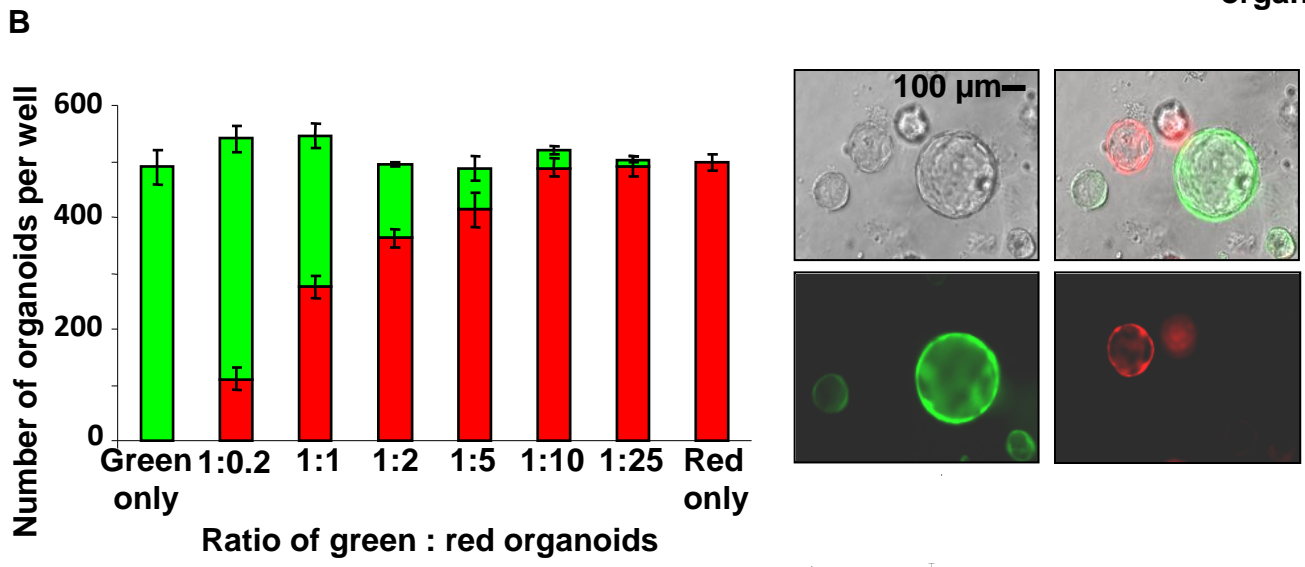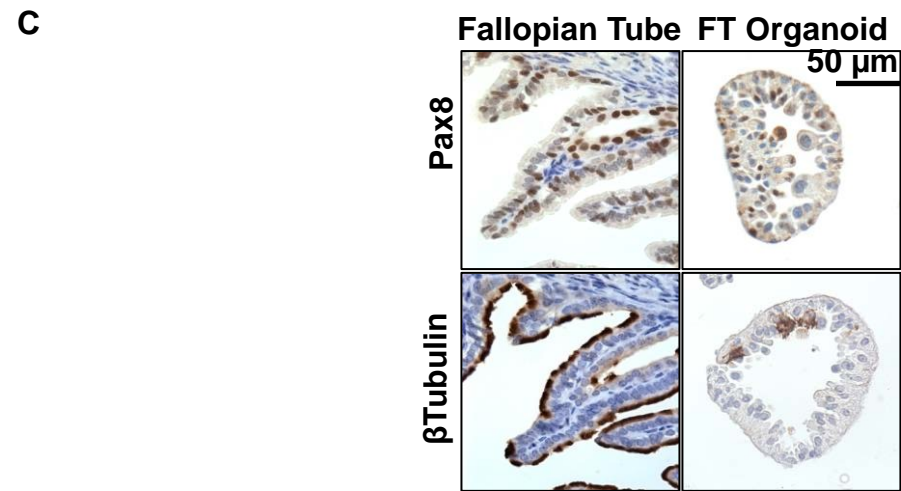

Supplement: suppl-figure-345.pdf [file suppl-figure-345.pdf]
