# Supplementary material
Source: PubMed Central journal article supplement (PMC5933088)
Supplement: suppl-table-345.pdf [file suppl-table-345.pdf]

**Supplemental Table 1. Antibodies and substrates used for immunohistochemistry**

| <b>Antibody</b>                                      | <b>Manufacturer</b> | <b>Catalog number</b> | <b>Dilution</b> |
|------------------------------------------------------|---------------------|-----------------------|-----------------|
| <b>Anti-CD44</b>                                     | <b>eBioscience</b>  | <b>17-0441</b>        | <b>1:250</b>    |
| <b>Anti-Ki67</b>                                     | <b>Vector</b>       | <b>VP-K451</b>        | <b>1:1000</b>   |
| <b>Anti-beta tubulin</b>                             | <b>Sigma</b>        | <b>T7941</b>          | <b>1:400</b>    |
| <b>Anti-Pax8</b>                                     | <b>ProteinTech</b>  | <b>10336-1-AP</b>     | <b>1:1000</b>   |
| <b>Biotinylated anti-mouse</b>                       | <b>Vector</b>       | <b>BMK-2202</b>       | <b>1:1000</b>   |
| <b>Biotinylated anti-rabbit</b>                      | <b>Jackson IR</b>   | <b>111-065-003</b>    | <b>1:1000</b>   |
| <b>Biotinylated anti-rat</b>                         | <b>eBioscience</b>  | <b>13-4813-85</b>     | <b>1:1000</b>   |
| <b>Alkaline phosphatase anti-rabbit</b>              | <b>Vector</b>       | <b>AP-1000</b>        | <b>1:500</b>    |
| <b>Streptavidin-horseradish peroxidase</b>           | <b>Jackson IR</b>   | <b>016-030-084</b>    | <b>1:1000</b>   |
| <b>DAB substrate kit</b>                             | <b>Biogenex</b>     | <b>HK542-XAK</b>      |                 |
| <b>Vector red alkaline phosphatase substrate kit</b> | <b>Vector</b>       | <b>SK-5100</b>        |                 |

**Supplemental Table 2. Antibodies used for FACS analysis**

| <b>Antibody</b>                       | <b>Manufacturer</b> | <b>Catalog number</b> |
|---------------------------------------|---------------------|-----------------------|
| <b>Anti-Mouse TER-119 FITC</b>        | <b>eBioscience</b>  | <b>11-5921-85</b>     |
| <b>Anti-Mouse CD45 (clone 30-F11)</b> | <b>eBioscience</b>  | <b>11-0451-02</b>     |
| <b>Anti-Mouse CD31 (PECAM-1)</b>      | <b>eBioscience</b>  | <b>14-0311-82</b>     |
| <b>Anti-Mouse CD326 (EpCAM) PE</b>    | <b>eBioscience</b>  | <b>12-5791-81</b>     |
